# Supplementary material for: Deficiency in the nuclear long noncoding RNA Charme causes myogenic defects and heart remodeling in mice
Source: PubMed Central journal article supplement — EMBO J. 2018 Sep 3;37(18):e99697. doi: 10.15252/embj.201899697 (PMC6138438; doi:10.15252/embj.201899697), 2018-09-03
Supplement: EMBJ-37-e99697-s007.pdf [file EMBJ-37-e99697-s007.pdf]

**RAW DATA FIGURE 1**

**Fig 1**

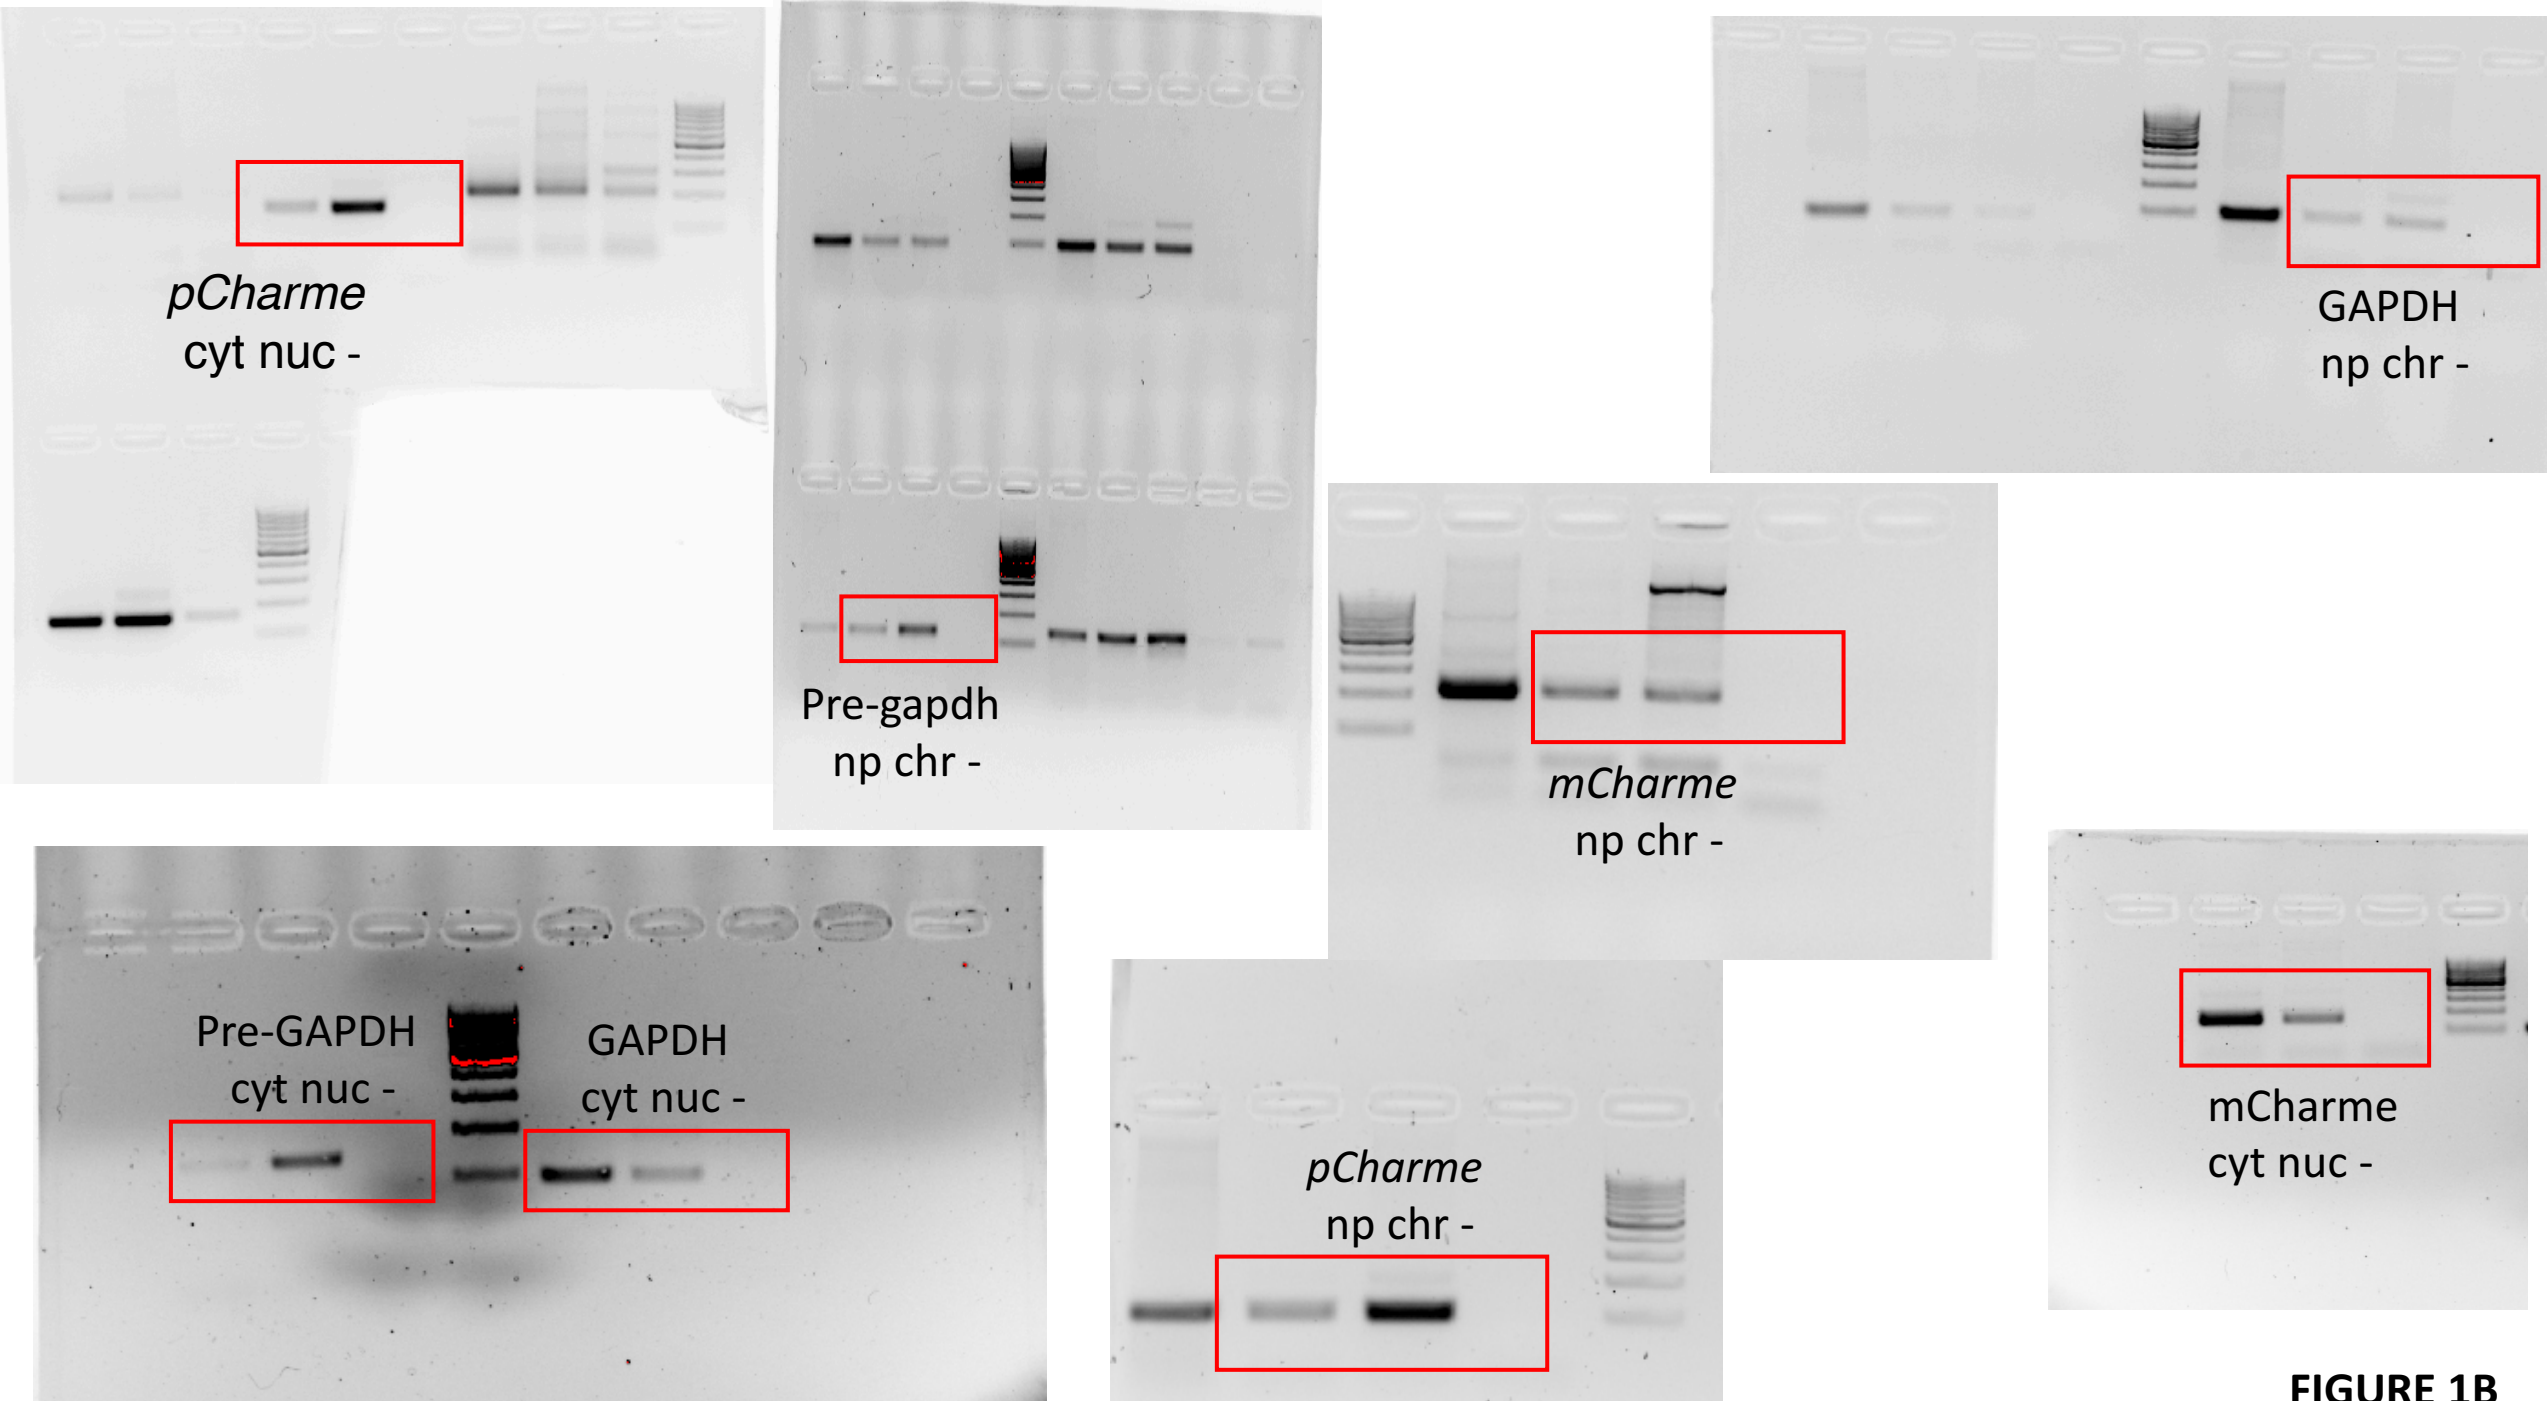

**FIGURE 1B**

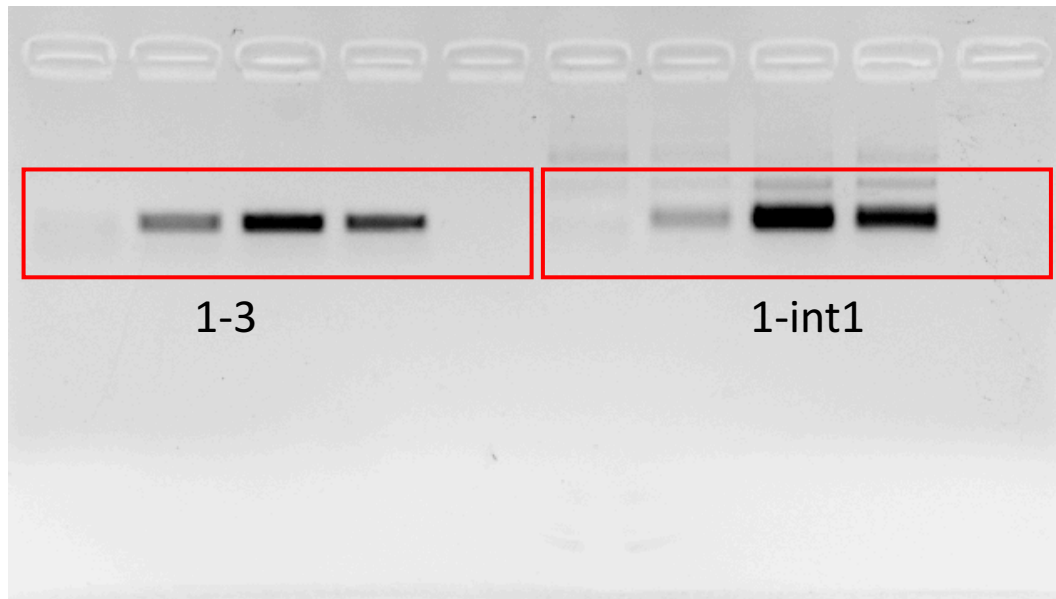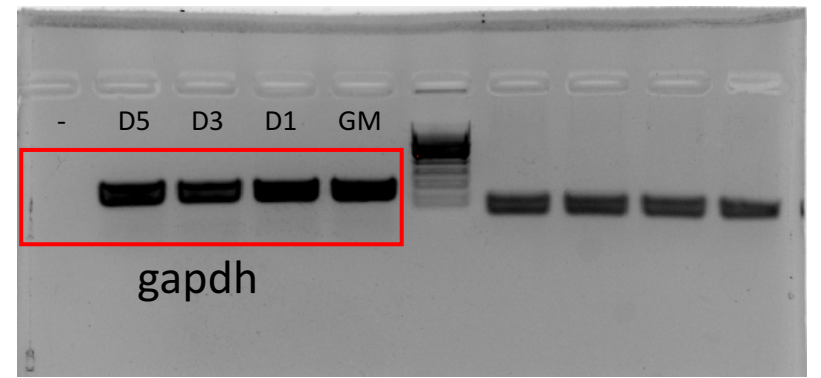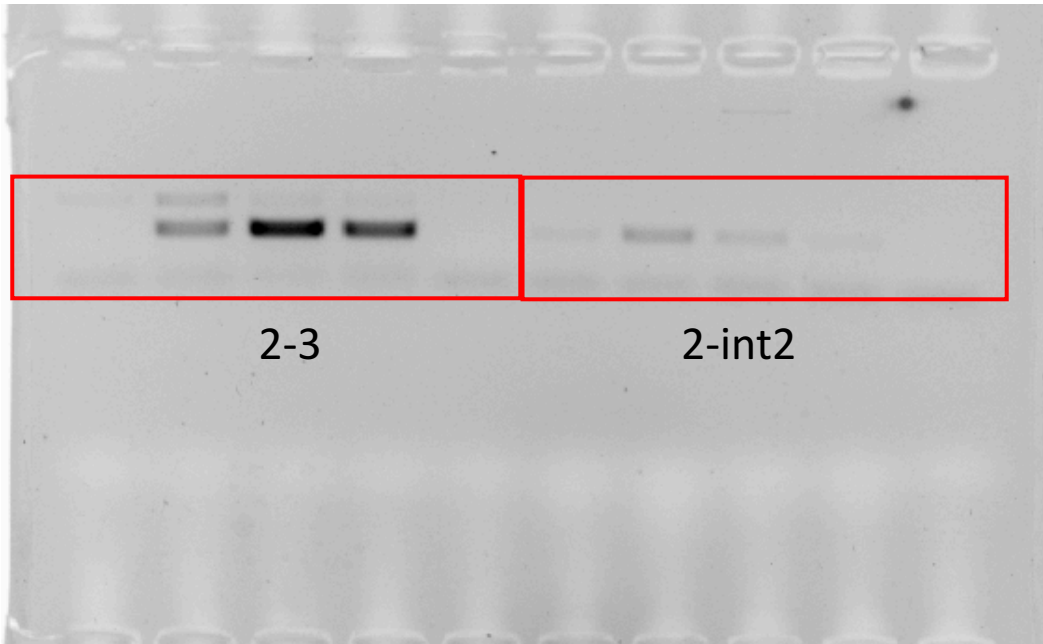

**FIGURE 1D**

## Figure 1C

*Charme* RNA

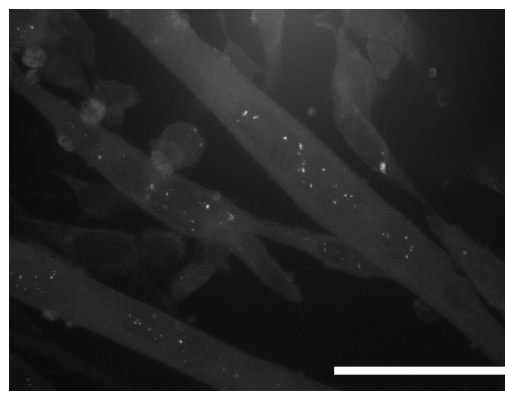

myosin heavy chain  
(MHC)

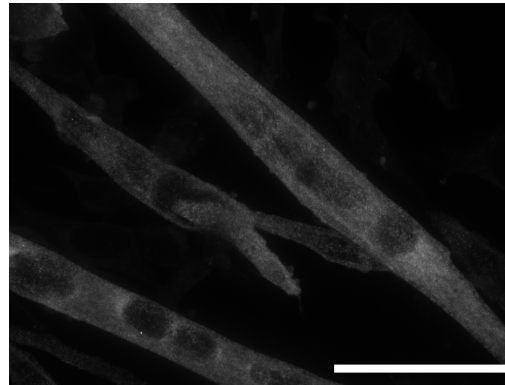

DAPI

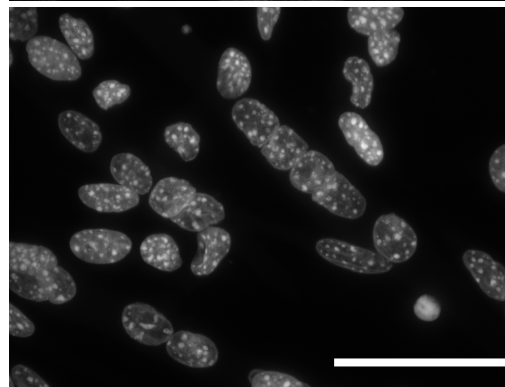

**Full size confocal images of co-staining for MHC protein and *Charme* RNA and DAPI (4',6-diamidino-2-phenylindole) in fully differentiated  $C_2C_{12}$  myotubes.**

The images were acquired as 16 bit depth with a resolution XY of 0,075 micron, by using a UPLANSapo 60 X oil objective (NA 1.35) and collected with MetaMorph software (Molecular Devices). Stacks of images were taken automatically with 0,2 micron between the Z-slices. The images were processed in post-acquisition analysis with FIJI software, in contrast and brightness for MHC immunolabeling; the RNA-FISH Z-stacks were processed with a Laplacian of Gaussian filter (sigma XYZ 3px) to enhance the spots signal over background. For both channels, Intensity threshold was manually adjusted using MetaMorph software. All adjustment were applied to the entire image. Z-stacks were merged with maximum intensity projection and combine in multicolour image. Scale bar = 50  $\mu$ m.

**Figure 1F**

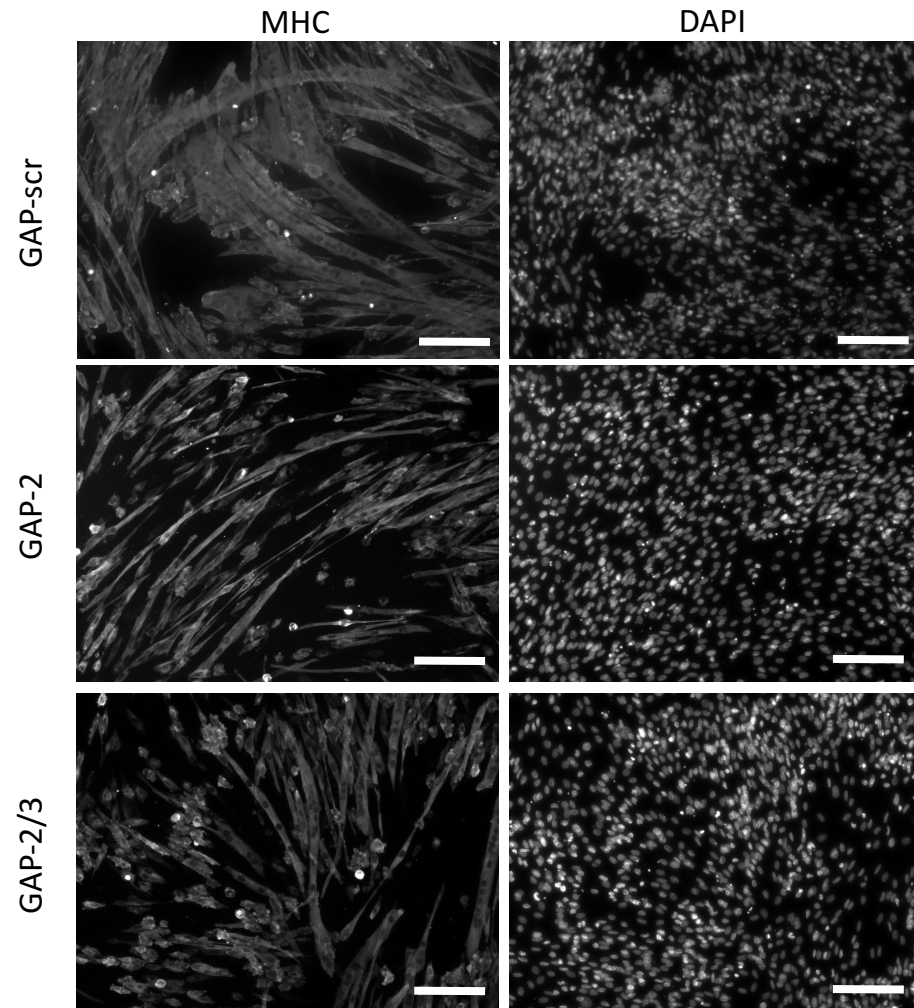

**Full size images of immunofluorescence for *MHC* protein and DAPI (4',6-diamidino-2-phenylindole) in fully differentiated C2C12 myotubes.**

The images were acquired as 8 bit depth by using a Plan-Neofluar EC 10×/0.3 M27 and collected with AxiVision Rel.4.8 software. The images were processed in post-acquisition analysis with FIJI software, in contrast and brightness for MHC and DAPI and all adjustment were applied to the entire image. For both channels, pseudocolor were added and color combine applied. Scale bar = 100  $\mu$ m.
