# Supplementary material for: Deficiency in the nuclear long noncoding RNA Charme causes myogenic defects and heart remodeling in mice
Source: PubMed Central journal article supplement — EMBO J. 2018 Sep 3;37(18):e99697. doi: 10.15252/embj.201899697 (PMC6138438; doi:10.15252/embj.201899697), 2018-09-03
Supplement: EMBJ-37-e99697-s008.pdf [file EMBJ-37-e99697-s008.pdf]

**RAW DATA FIGURE 2**

**Fig 2**

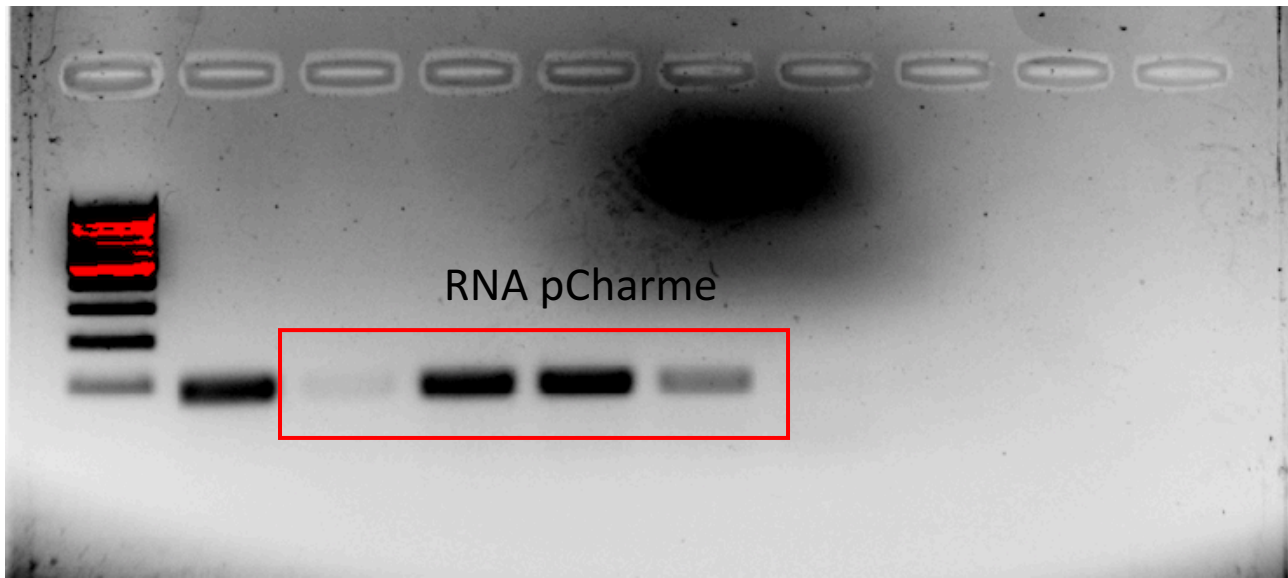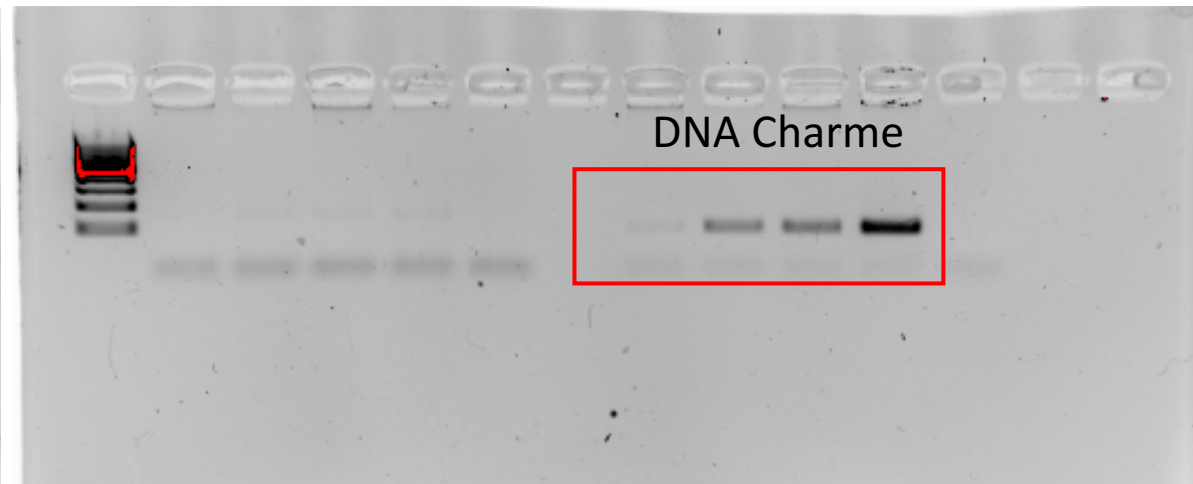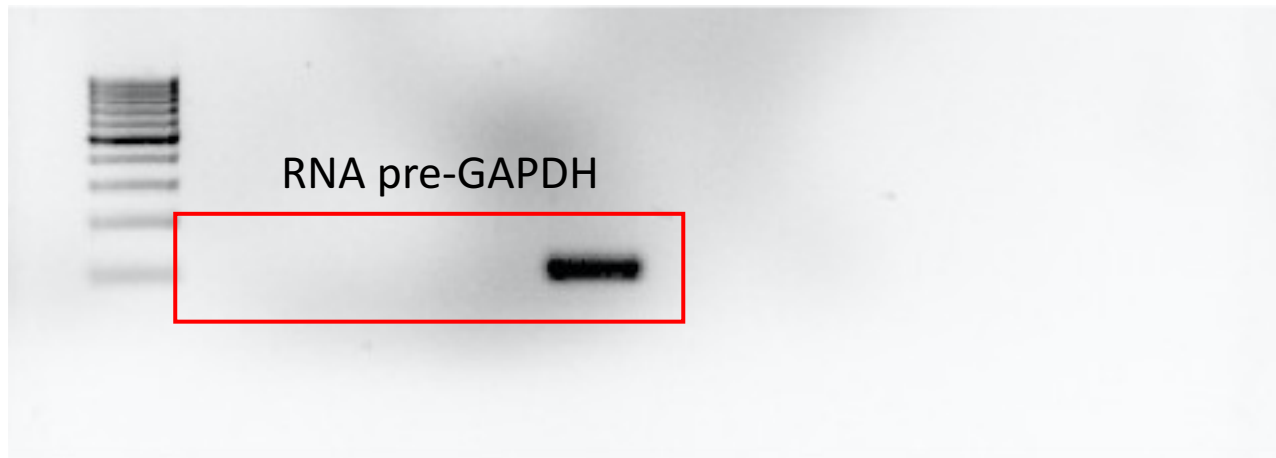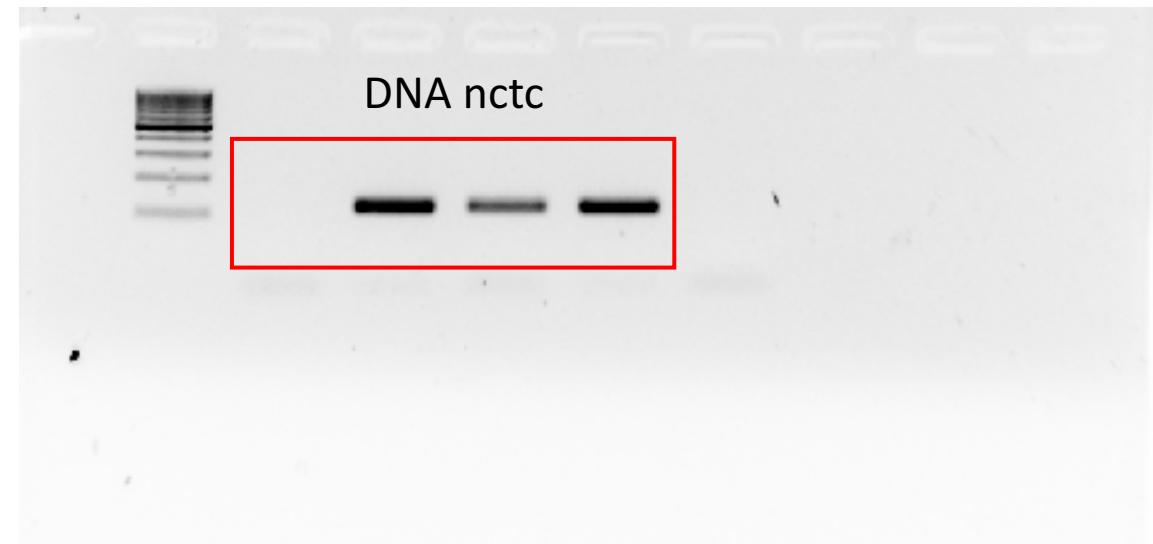

**FIGURE 2D**

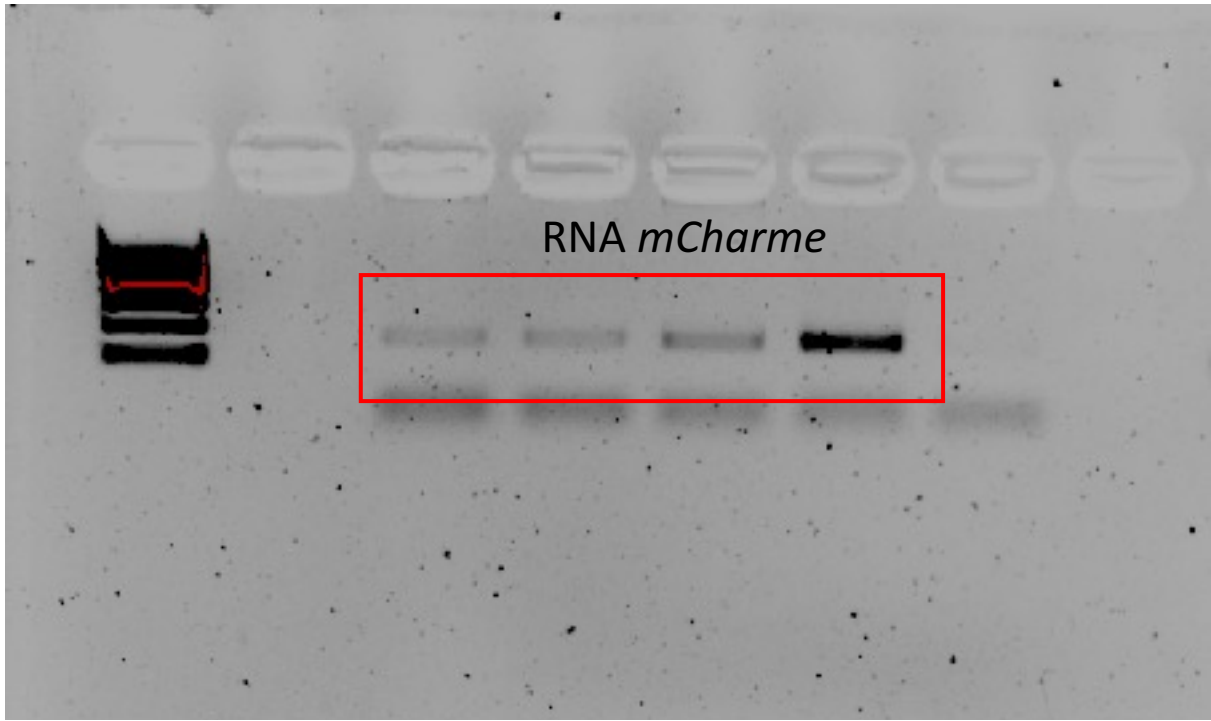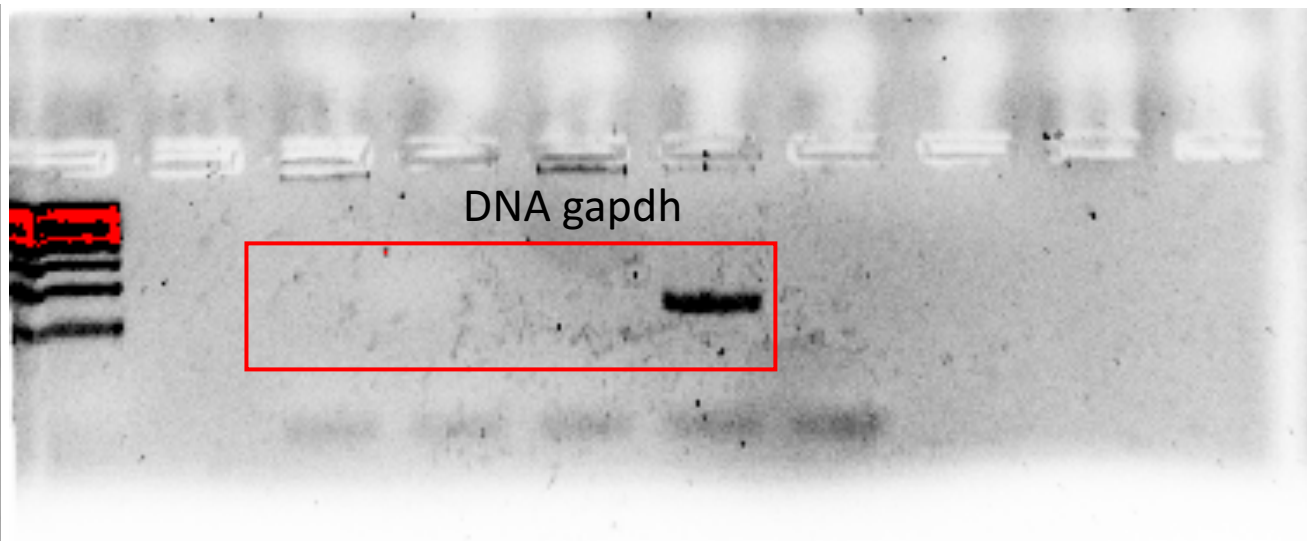

FIGURE 2D

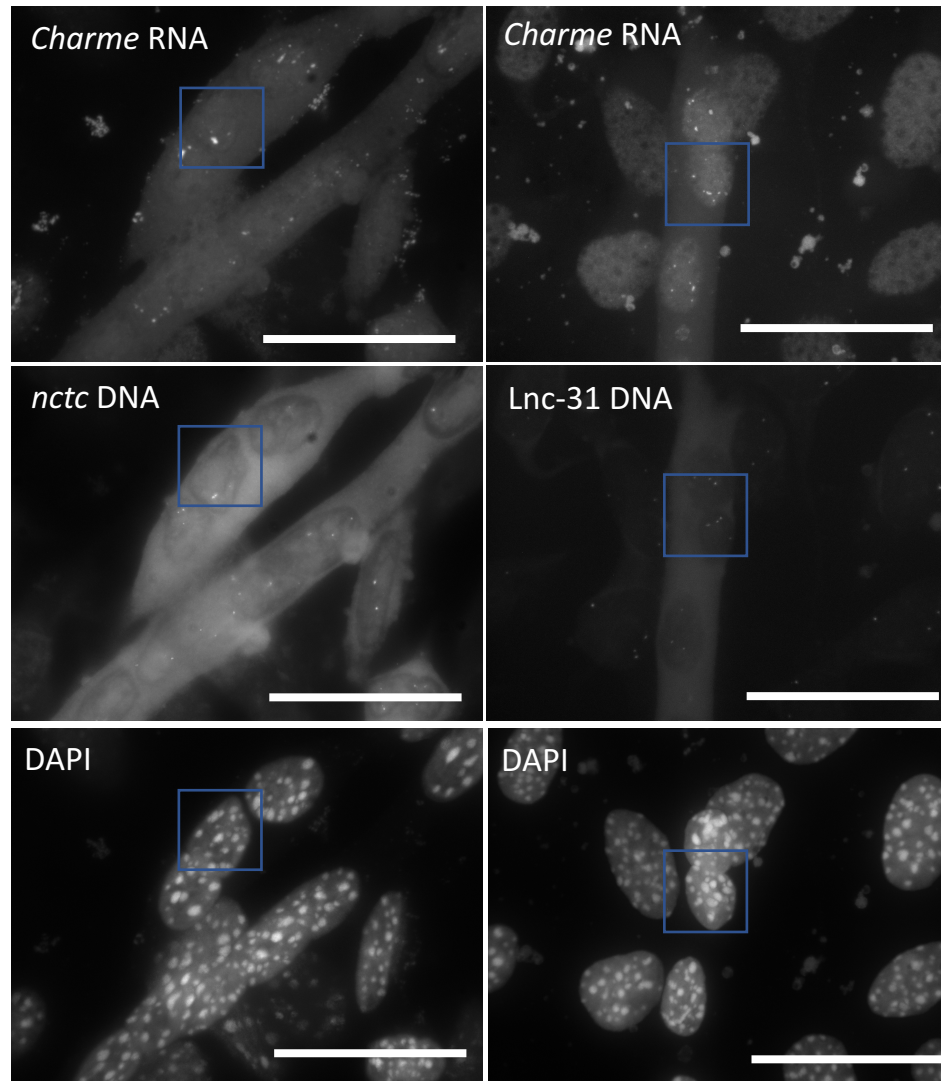

**Full size confocal images of RNA/DNA FISH for *Charme* RNA and *nctc/lnc31* genomic regions and DAPI (4',6-diamidino-2-phenylindole) in 2-days differentiated myotubes.**

The images were acquired as 16 bit depth with a resolution XY of 0,075 micron, by using a UPLANSapo 60 X oil objective (NA 1.35) and collected with MetaMorph software (Molecular Devices). Stacks of images were taken automatically with 0,2 micron between the Z-slices.

The images were processed in post-acquisition analysis with FIJI software and all adjustment were applied to the entire image.

RNA and DNA FISH 16 bit Z-stacks were processed with a Laplacian of Gaussian filter (sigma XYZ 3px) to enhance the spots signal over background and color balance was manually adjusted using MetaMorph or ImageJ softwares setting a reference value considering the without specific staining as a background.

All Z stacks were merged with maximum intensity projection and combine in multicolour image. Blue square: area enlarged in the figure. Scale bar = 50  $\mu$ m.

**Figure 2E**
