# Supplementary material for: Deficiency in the nuclear long noncoding RNA Charme causes myogenic defects and heart remodeling in mice
Source: PubMed Central journal article supplement — EMBO J. 2018 Sep 3;37(18):e99697. doi: 10.15252/embj.201899697 (PMC6138438; doi:10.15252/embj.201899697), 2018-09-03
Supplement: EMBJ-37-e99697-s010.pdf [file EMBJ-37-e99697-s010.pdf]

**RAW DATA FIGURE 4**

**Fig 4**

Figure 4C

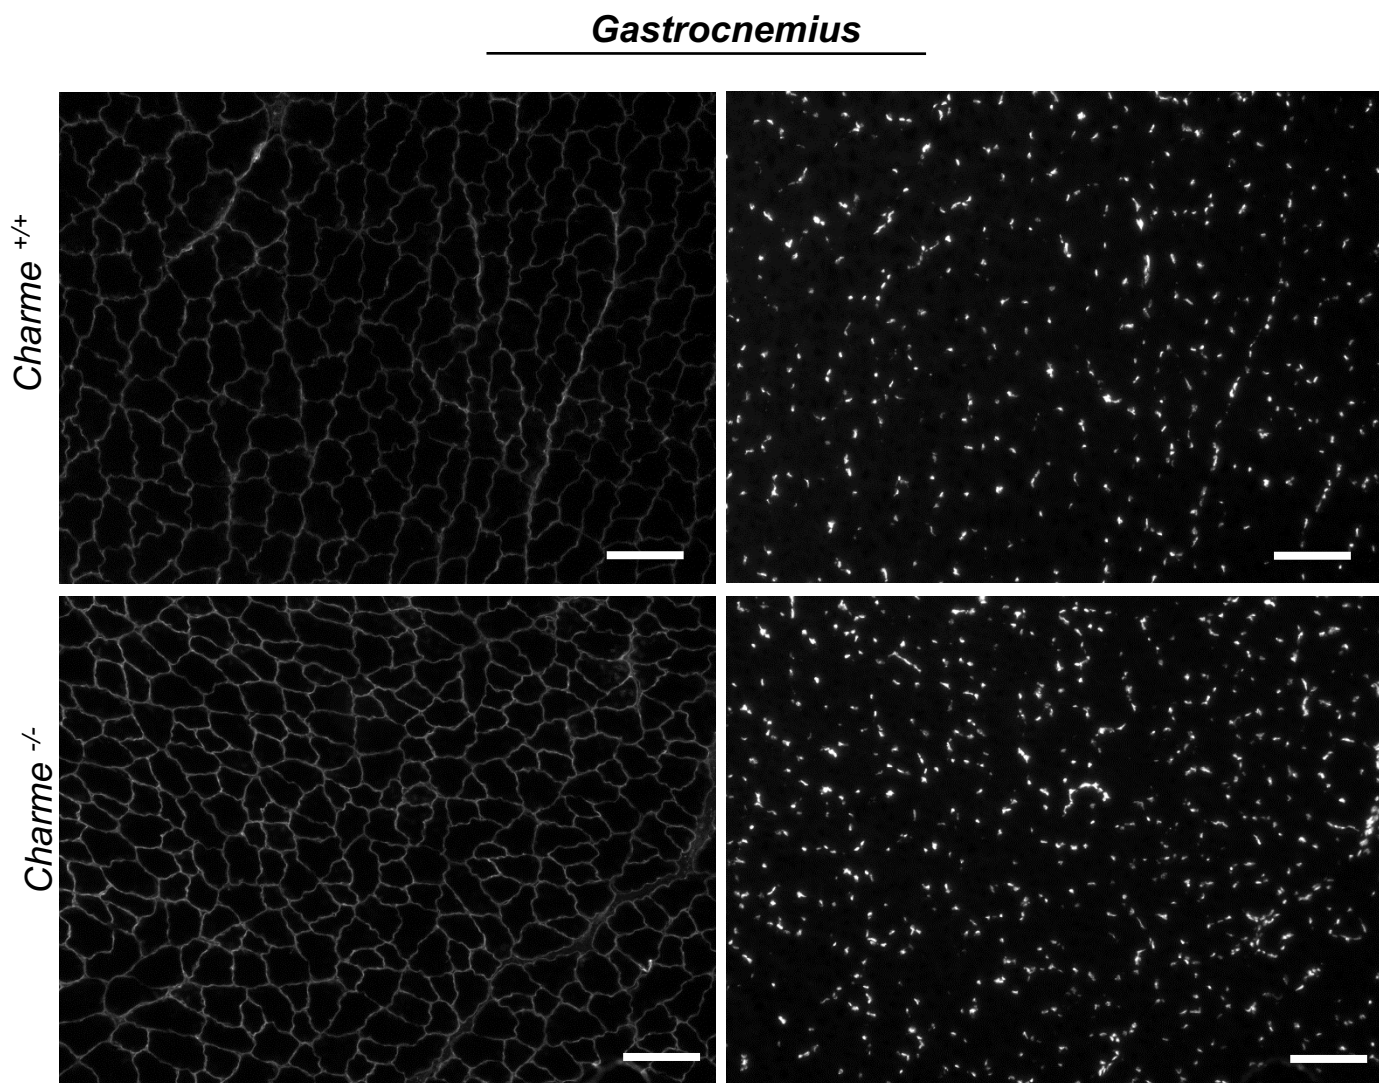

**Full size images of immunofluorescence for dystrophin protein and DAPI (4',6-diamidino-2-phenylindole) on *Charme*<sup>+/+</sup> and *Charme*<sup>-/-</sup> skeletal gastrocnemius and heart biopsies.**

The images were acquired as 8 bit depth by using a Plan-Neofluar EC 10×/0.3 M27 (gastrocnemius) or LD 20×/0.4 Korr (heart) and collected with AxioVision Rel.4.8 software. The entire images were processed in post-acquisition analysis with FIJI software, in contrast and brightness for Dystrophin and DAPI. For both channels, pseudocolor were added and color combine applied. Scale bar = 100 μm.
