# Supplementary figures and images for: Deficiency in the nuclear long noncoding RNA Charme causes myogenic defects and heart remodeling in mice
Source: PubMed Central journal article supplement — EMBO J. 2018 Sep 3;37(18):e99697. doi: 10.15252/embj.201899697 (PMC6138438; doi:10.15252/embj.201899697), 2018-09-03

**RAW DATA FIGURE 6**

**Fig 6**

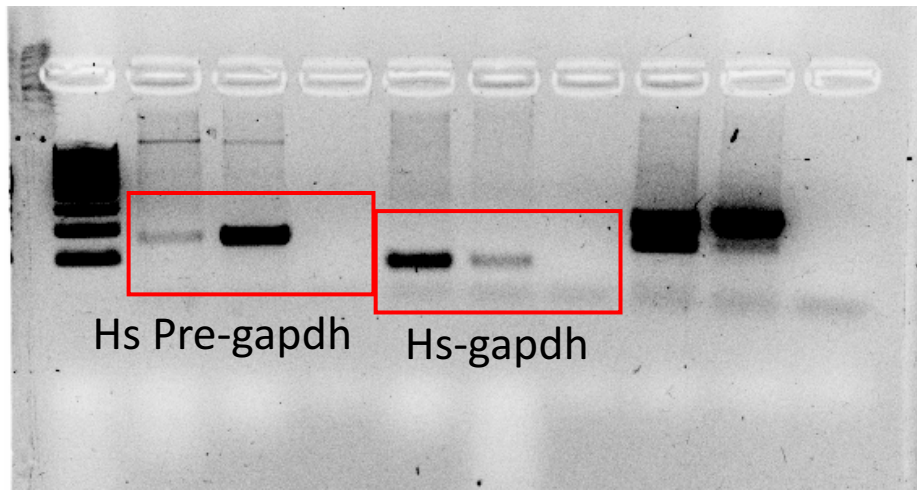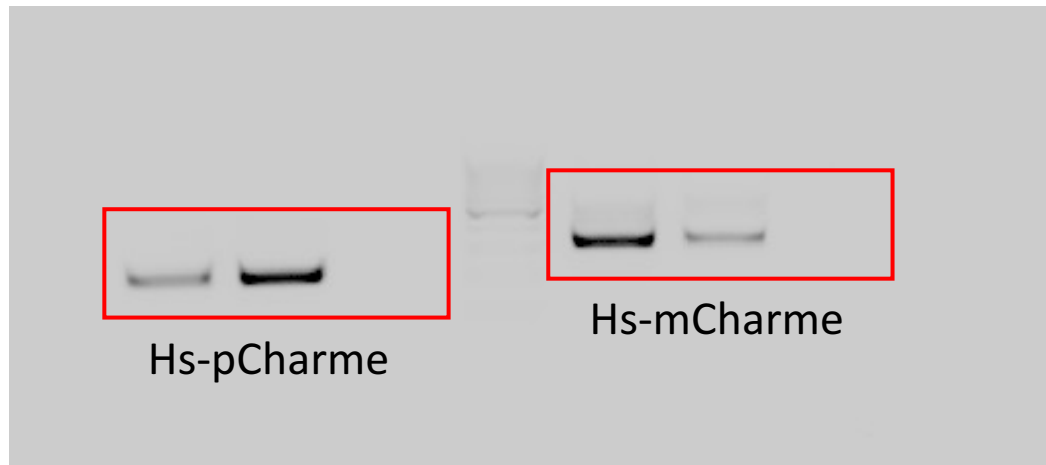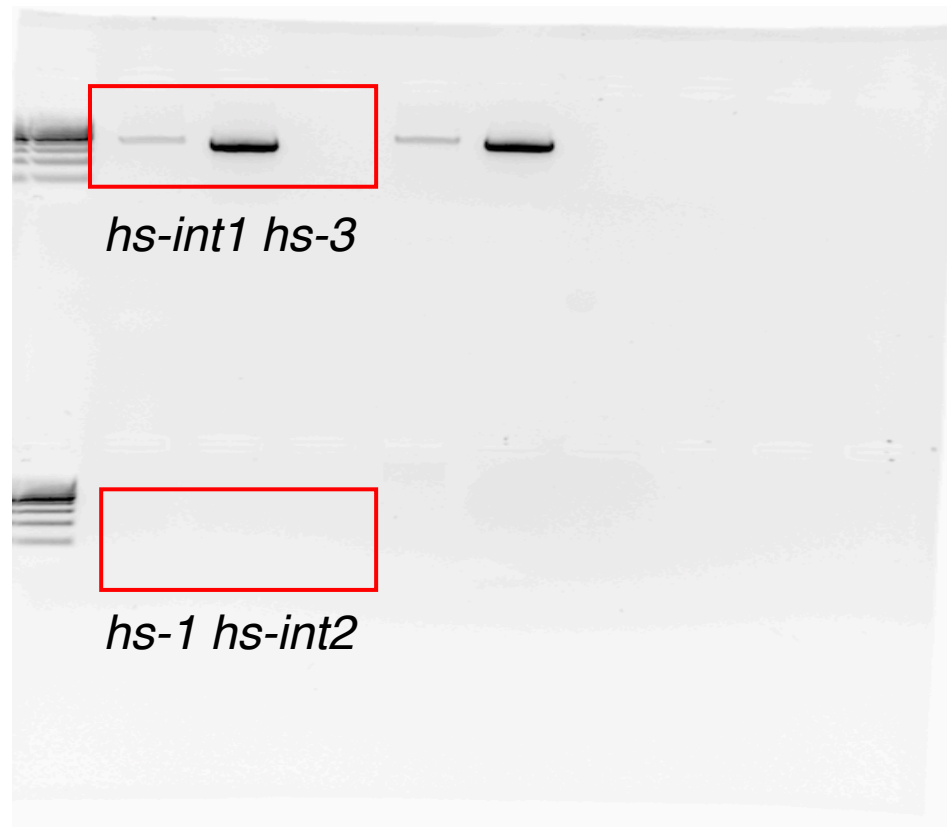

**FIGURE 6C and D**

Supplement: EMBJ-37-e99697-s012.pdf [file EMBJ-37-e99697-s012.pdf]
